# Supplementary material for: Hypothyroidism Intensifies Both Canonic and the De Novo Pathway of Peroxisomal Biogenesis in Rat Brown Adipocytes in a Time-Dependent Manner
Source: MDPI journal article supplement (doi:10.3390/cells10092248), 2021-08-30
Supplement: s1 [file s1]

## Supplementary Material 2

### *Video data – Immunofluorescent labelling of catalase*

Semi-thin sections (2  $\mu\text{m}$ ) of interscapular depo of brown adipose tissue were used for standard immunolabeling procedure, using primary antibody against CAT, and appropriate fluorochrome-conjugated secondary antibody (1:400; Alexa Fluor® 488 goat anti-rabbit, Thermo Fisher Scientific, USA). Sytox orange (1  $\mu\text{L ml}^{-1}$ , Thermo Fisher Scientific) was used for nuclei counterstaining. Slides were mounted with Mowiol (Polysciences, Eppenheim, Germany), and confocal images were acquired with a Leica TSC SP8 confocal microscope (Leica Microsystems). Z-stacks of images of 1024 x 1024 pixels were acquired using 63x/1.4 NA oil-immersion objective, with 7x scan zoom to meet the Nyquist criterion. The 3d reconstruction of z-stacks was done using LAS AF (Leica Application Suite, Advanced Fluorescence Lite, 2.6.3) software and exported as video in AVI file format.

CAT – green, Sytox orange – blue, nuclei. Euthyroid control – Control, hypothyroid groups treated with methimazole for 7 (M7), 15 (M15), and 21 (M21) days.
