# Supplementary material for: Hypothyroidism Intensifies Both Canonic and the De Novo Pathway of Peroxisomal Biogenesis in Rat Brown Adipocytes in a Time-Dependent Manner
Source: Cells. 2021 Aug 30;10(9):2248. doi: 10.3390/cells10092248 (PMC8472630; doi:10.3390/cells10092248)
Supplement: Supplementary file 1 [file cells-10-02248-s001.zip]

Archive with 6 entries (6 files):
- Supp.1_Control.avi
- Supp.2_M7.avi
- Supp.3_M15.avi
- Supp.4_M21.avi
- Supplementary Material 1_Serum levels of T3, T4, and TSH.pdf
- Supplementary Material_2_video.pdf
